# Supplementary material
Source: PubMed Central journal article supplement (PMC10406838)

Figure 1E

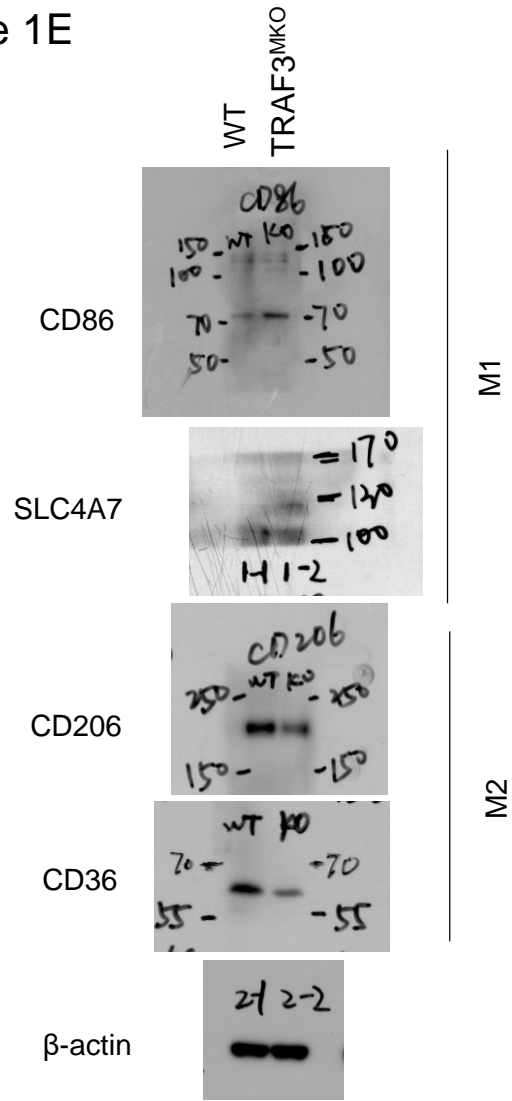

Figure 4A

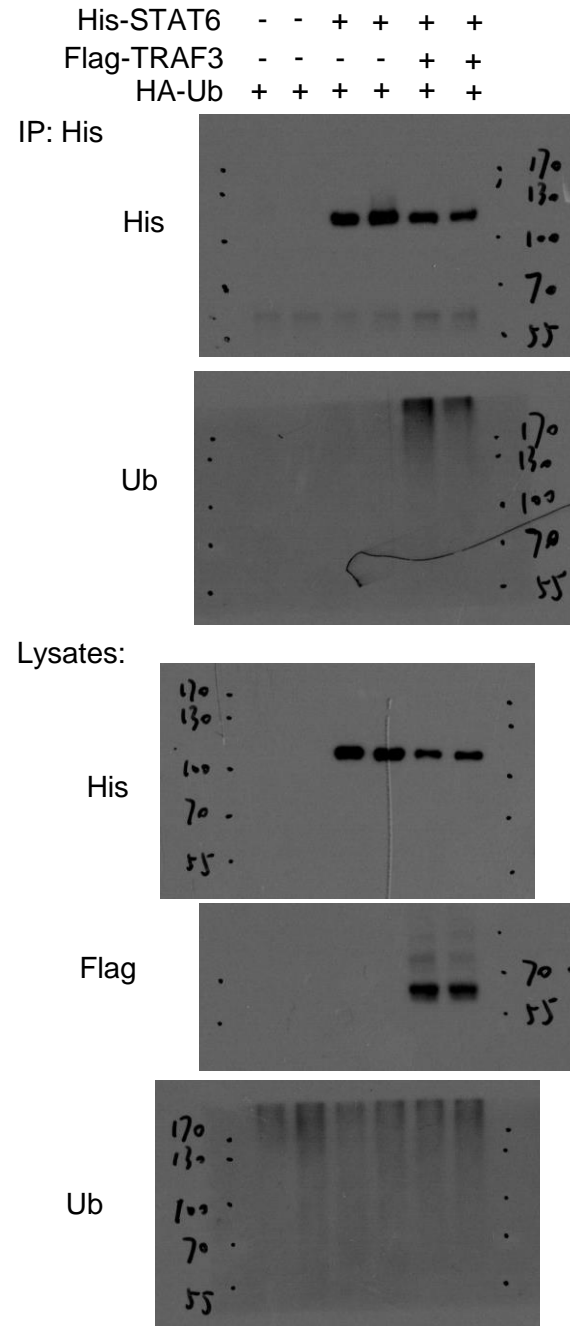

Figure 4E

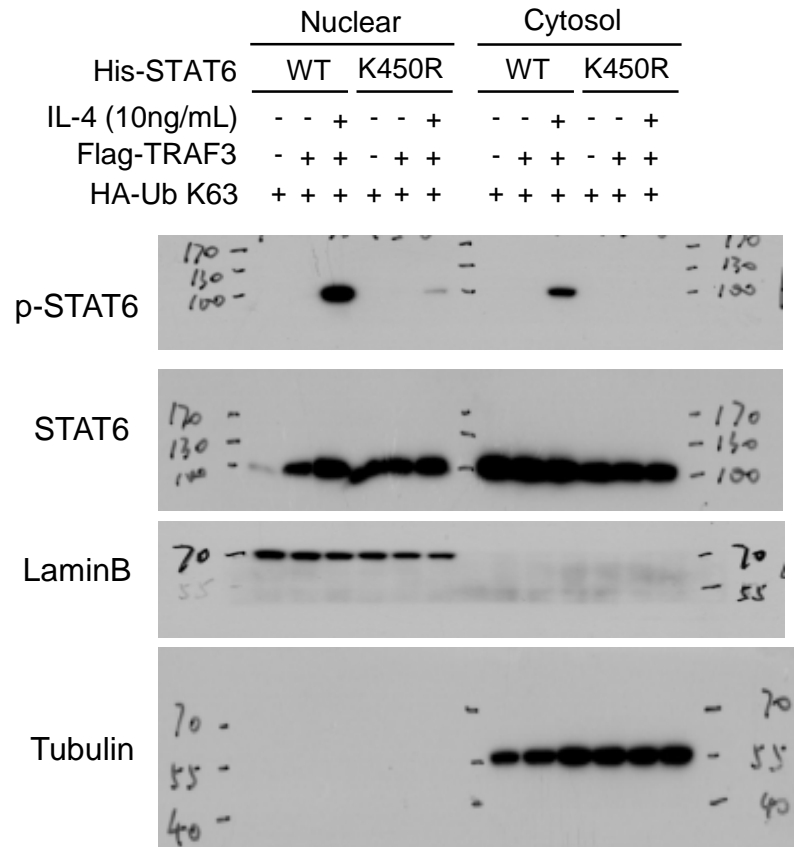

Figure S3

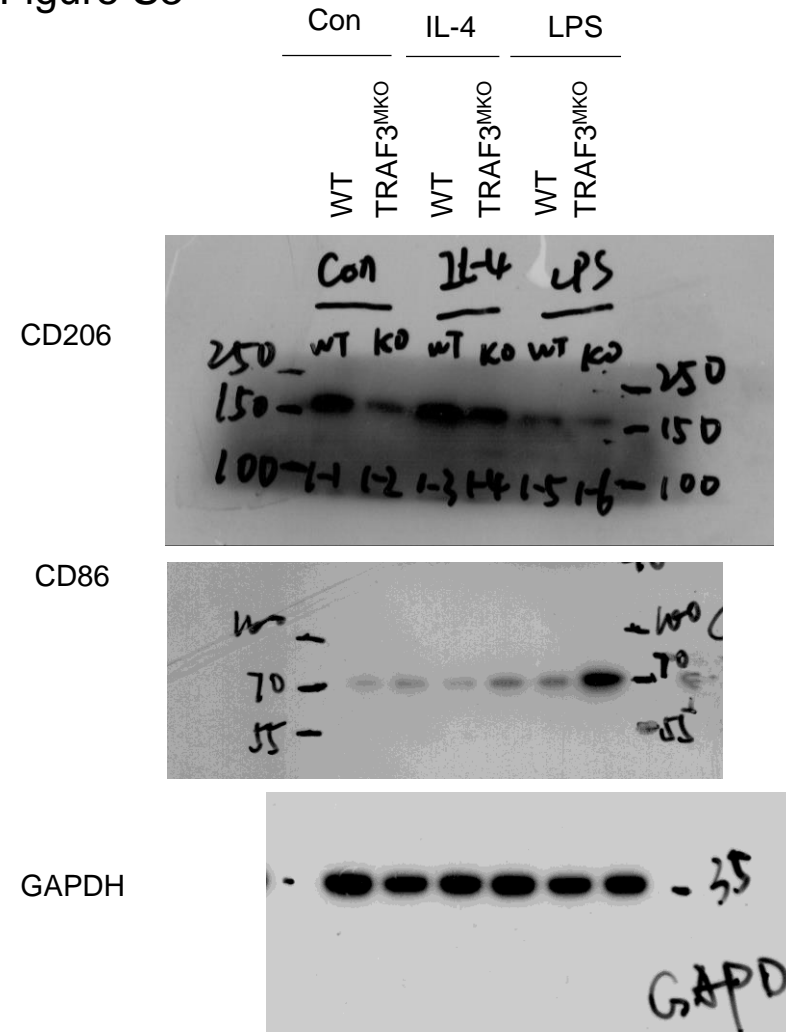

Supplement: 41418_2023_1194_MOESM2_ESM.pdf [file 41418_2023_1194_MOESM2_ESM.pdf]
